# Supplementary material for: Mechanistic insights into artificial metalloenzymes towards imine reduction
Source: Royal Society of Chemistry journal article supplement (doi:10.1039/c9cp04473f), 2019-01-01
Supplement: c9cp04473f1.pdf [file c9cp04473f1.pdf]

## Electronic Supplementary Information

### Mechanistic Insights into Artificial Metalloenzyme towards Imine Reduction

Haisong Feng,<sup>‡a</sup> Xuan Guo,<sup>‡a</sup> Hui Zhang,<sup>a</sup> Lifang Chen,<sup>a</sup> Pan Yin,<sup>a</sup> Chunyuan Chen,<sup>a</sup> Xinli  
Duan,<sup>a</sup> Xin Zhang <sup>\*a</sup> and Min Wei <sup>a</sup>

<sup>a</sup> State Key Laboratory of Chemical Resource Engineering, Beijing Advanced Innovation Center for Soft Matter Science and Engineering, Beijing University of Chemical Technology, Beijing 100029, P. R. China

#### Contents

|                                                                                                                              |     |
|------------------------------------------------------------------------------------------------------------------------------|-----|
| Selection of basis sets and methods.....                                                                                     | S2  |
| Table S1 The comparison of selected bond length with the crystal values based on different basis sets<br>in S112H model..... | S4  |
| Table S2 The comparison of selected bond length with the crystal values based on different methods<br>in S112H model.....    | S4  |
| Figure S1 Thermodynamic diagram of phase transition.....                                                                     | S5  |
| Figure S2 The position of the substituent group in S112H Sav (a) and K121H Sav (b), respectively...                          | S5  |
| Cartesian coordinates (in Å) of stability points of the favorable path in S112H system .....                                 | S6  |
| Cartesian coordinates (in Å) of stability points of the favorable path in K121H system.....                                  | S16 |
| Cartesian coordinates (in Å) of the catalysts and substrate in two systems.....                                              | S23 |

## Selection of basis sets and methods

The active site was sensitive to basis sets and methods. Especially for biosystem, the non-bonded interaction is important for the part of catalytic active site. Therefore, an appropriate functional method and basis sets need to be chose to calculate our study systems. In 2006, Truhlar group developed M06 series of functional <sup>1</sup> including M06、 M06-L、 M06-2X <sup>2</sup>. The testing result indicate that those functional methods can perfectly describe the non-bonded interaction. In addition, our previous works found that the results of  $\omega$ B97X-D <sup>3</sup> is also reliable <sup>4-6</sup>. In order to find an appropriate method and basis set for our research system, we calculated the key bonds length of active site models using different methods and basis sets, and then compared those bonds with crystal structure.

We tested the basis sets on the base of the M06 method, and chose LANL2DZ, SDD <sup>7,8</sup> and def2-TZVP <sup>9</sup> basis sets for transition metal (Rh atom), the 6-31G(d,p) basis set for the other atoms. We calculated the key bond lengths which included the rhodium with carbon on Cp\* ring, nitrogen of H112 as well as nitrogen-hydrogen bond on protonated K121. The datum of crystal and calculated bond lengths were summarized in Table S1. The calculated results of def2-TZVP basis set (the average of the deviation is 0.060) are the closest to the crystal values, but the spent time is about three to four times than others. The calculated results of SDD basis set (the average of the deviation is 0.070) are better than those of LANL2DZ basis set, and its calculated time is much shorter than that of def2-TZVP. Therefore, we chose SDD basis sets to optimize the structure and add the def2-TZVP basis sets to calculate the valence electrons of metal in the single-point energy calculation with SMD.

Then, we tested the functional methods based on the SDD basis sets. The three functionals of  $\omega$ B97X-D、 M06-L and M06 were chosen. The compared results of different functionals were shown in Table S2. The datum of Table S2 demonstrated that M06-L method is the best for active site models, because its average of the deviation (0.051) is smaller than the others. By observing the bond length,

we found that most of the bond lengths change slightly (the deviation is below 0.1 Å) except Rh-N bond. This is because that Rh-N (the N atom of histidine) is a coordination bond which could be influenced by the protein environment.

According to the above test results, we confirmed that the calculated level for the active site models is M06-L/6-31+G(d,p) +def2-TZVP(SDD)//M06-L/6-31G(d,p)+SDD.

- [1] Zhao, Y.; Truhlar, D. G. A new local density functional for main-group thermochemistry, transition metal bonding, thermochemical kinetics, and noncovalent interactions. *J. Chem. Phys.* **2006**, 125 (19):194101
- [2] Zhao, Y.; Truhlar, D. G. The M06 suite of density functionals for main group thermochemistry, thermochemical kinetics, noncovalent interactions, excited states, and transition elements: two new functionals and systematic testing of four M06-class functionals and 12 other functionals. *Theor. Chem. Acc.* **2008**, 120(1), 215-241.
- [3] Chai, J. D.; Head-Gordon, M. Long-range corrected hybrid density functionals with damped atom–atom dispersion corrections. *Phys. Chem. Chem. Phys.* **2008**, 10(44), 6615-6620.
- [4] Li, H., Ma, X., Zhang, B., Lei, M. DFT Study on the Mechanism of Tandem Oxidative Acetoxylation/Ortho C–H Activation/Carbocyclization Catalyzed by Pd(OAc)<sub>2</sub>. *Organometallics* **2016**, 35 (19) 3301-3310.
- [5] Li, H., Ma, X., Lei, M. Substituent effects and chemoselectivity of the intramolecular Buchner reaction of diazoacetamide derivatives catalyzed by the di-Rh(II)-complex. *Dalton. Trans.* **2016**, 45 (20) 8506-8512.
- [6] Lei, M., Pan, Y., Ma, X. The Nature of Hydrogen Production from Aqueous-Phase Methanol Dehydrogenation with Ruthenium Pincer Complexes Under Mild Conditions. *Eur. J. Inorg. Chem.* **2015**, 2015 (5) 794-803.
- [7] Bergner, A., Dolg, M., Küchle, W., Stoll, H., Preuß, H. Ab initio energy-adjusted pseudopotentials for elements of groups 13–17. *Mol. Phys.* **1993**, 80 (6):1431-1441.
- [8] Dolg, M., Wedig, U., Stoll, H., Preuss, H. Energy-adjusted abinitio pseudopotentials for the first row transition elements. *J. Chem. Phys.* **1987**, 86 (2):866-872.
- [9] Eichkorn, K., Weigend, F., Treutler, O., Ahlrichs, R. Auxiliary basis sets for main row atoms and transition metals and their use to approximate Coulomb potentials. *Theor. Chem. Acc.* **1997**, 97 (1):119-124.

**Table S1.** The comparison of selected bond length with the crystal structures based on various basis sets in S112H.

| Bond                  | Bond Length |                 |                   | Deviation   |                 |                   |             |
|-----------------------|-------------|-----------------|-------------------|-------------|-----------------|-------------------|-------------|
|                       | Crystal     | M06/<br>LanL2DZ | M06/<br>def2-TZVP | M06/<br>SDD | M06/<br>LanL2DZ | M06/<br>def2-TZVP | M06/<br>SDD |
| Rh-N                  | 2.334       | 2.166           | 2.151             | 2.154       | 0.168           | 0.183             | 0.180       |
| Rh-C1                 | 2.099       | 2.171           | 2.144             | 2.160       | 0.085           | 0.058             | 0.074       |
| Rh-C2                 | 2.112       | 2.158           | 2.136             | 2.150       | 0.083           | 0.061             | 0.075       |
| Rh-C3                 | 2.084       | 2.197           | 2.163             | 2.183       | 0.098           | 0.064             | 0.084       |
| Rh-C4                 | 2.086       | 2.197           | 2.167             | 2.184       | 0.085           | 0.055             | 0.072       |
| Rh-C5                 | 2.075       | 2.181           | 2.158             | 2.170       | 0.097           | 0.074             | 0.086       |
| N-H1                  | 1.008       | 1.027           | 1.022             | 1.027       | 0.019           | 0.014             | 0.019       |
| N-H2                  | 1.008       | 1.027           | 1.022             | 1.027       | 0.019           | 0.014             | 0.019       |
| N-H3                  | 1.008       | 1.026           | 1.020             | 1.026       | 0.018           | 0.012             | 0.018       |
| The average deviation |             |                 |                   |             | 0.075           | 0.060             | 0.070       |

**Table S2.** The comparison of selected bond length with the crystal structures based on various methods in S112H.

| Bond                  | Bond Length |               |                | Deviation   |              |                |             |
|-----------------------|-------------|---------------|----------------|-------------|--------------|----------------|-------------|
|                       | Crystal     | M06-L/<br>SDD | ωb97xd/<br>SDD | M06/<br>SDD | M06L/<br>SDD | ωb97xd/<br>SDD | M06/<br>SDD |
| Rh-N                  | 2.334       | 2.179         | 2.138          | 2.154       | 0.155        | 0.196          | 0.180       |
| Rh-                   | 2.099       | 2.128         | 2.152          | 2.160       | 0.029        | 0.053          | 0.061       |
| Rh-C2                 | 2.112       | 2.123         | 2.133          | 2.150       | 0.011        | 0.021          | 0.038       |
| Rh-C3                 | 2.084       | 2.156         | 2.185          | 2.183       | 0.072        | 0.101          | 0.099       |
| Rh-C4                 | 2.086       | 2.160         | 2.169          | 2.184       | 0.074        | 0.083          | 0.098       |
| Rh-C5                 | 2.075       | 2.145         | 2.164          | 2.170       | 0.070        | 0.089          | 0.095       |
| N-H1                  | 1.008       | 1.024         | 1.036          | 1.027       | 0.016        | 0.028          | 0.019       |
| N-H2                  | 1.008       | 1.025         | 1.024          | 1.027       | 0.017        | 0.016          | 0.019       |
| N-H3                  | 1.008       | 1.024         | 1.023          | 1.026       | 0.016        | 0.015          | 0.018       |
| The average deviation |             |               |                |             | 0.051        | 0.067          | 0.070       |

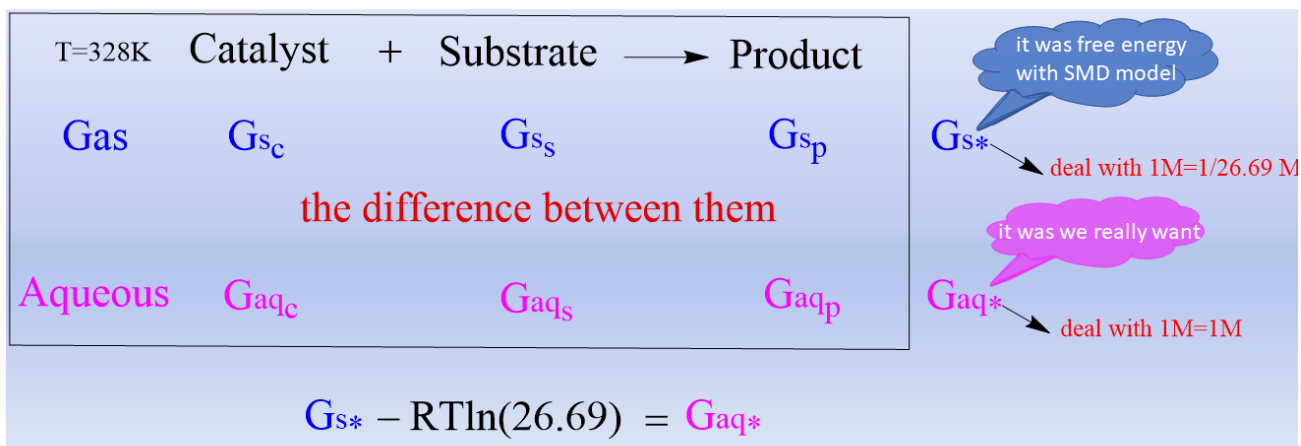

**Figure S1.** Thermodynamic diagram of phase transition. Standard molar volume  $V^m = 26.69$  L/mol at 328 K and ideal gas constant  $R=0.0019872$  kcal/(mol·K).

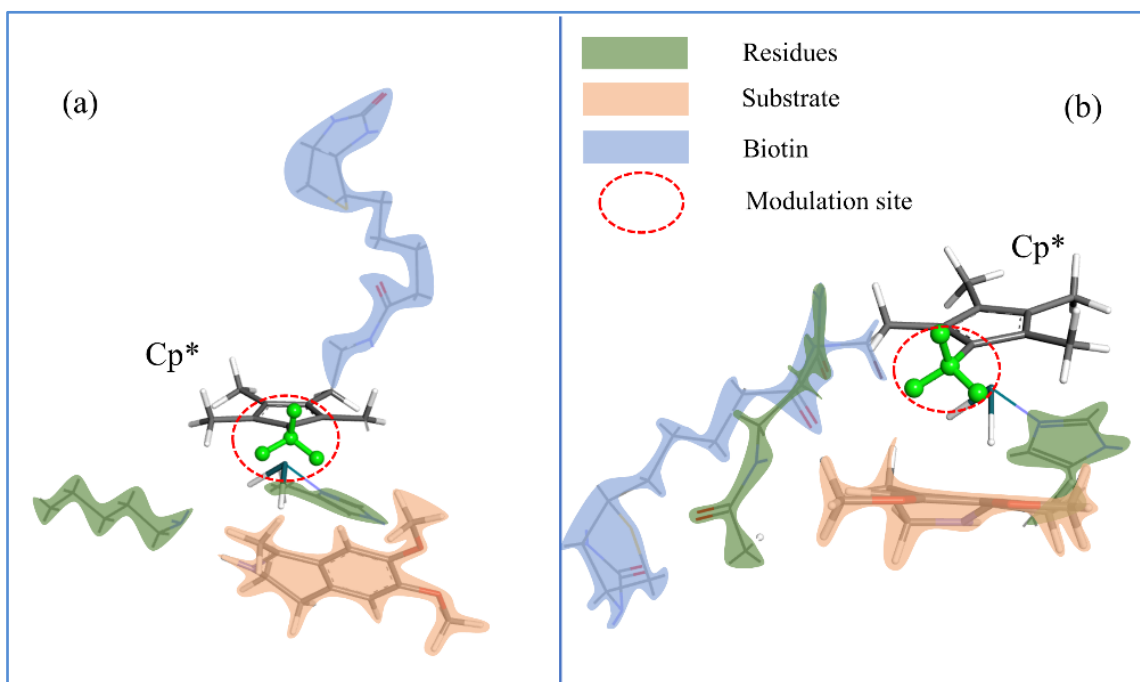

**Figure S2.** The position of the substituent group in S112H Sav (a) and K121H Sav (b), respectively.

## Cartesian coordinates (in Å) of stability points of the favorable path in S112H

system

$R_{eq}^S$

---

|   | Coordinates (Angstroms) |             |             |
|---|-------------------------|-------------|-------------|
|   | X                       | Y           | Z           |
| H | -2.35091300             | 2.23422400  | 0.12843900  |
| H | -3.26164900             | 1.09520300  | 1.74977600  |
| N | 3.15232200              | -1.95329500 | 0.31957000  |
| C | 2.40857700              | -0.94225100 | 1.04888400  |
| C | 1.05302900              | -0.61370300 | 0.43641200  |
| C | 0.35347800              | 0.38166200  | 1.30799900  |
| C | 0.36598500              | 1.79233500  | 1.16268200  |
| C | 1.08827900              | 2.58076500  | 0.12615200  |
| H | 2.04069100              | 2.96338400  | 0.51350500  |
| H | 0.50475500              | 3.44243400  | -0.20991600 |
| H | 1.31941000              | 1.97674500  | -0.75614600 |
| C | -0.41321300             | 2.34546900  | 2.25628300  |
| C | -0.55751000             | 3.79534900  | 2.56679400  |
| H | 0.27263800              | 4.15320200  | 3.18845900  |
| H | -1.48376600             | 3.99983200  | 3.11161200  |
| H | -0.56595800             | 4.40000500  | 1.65590300  |
| C | -0.81395000             | 1.25106000  | 3.11117000  |
| C | -1.50398500             | 1.38607300  | 4.42336300  |
| H | -0.77107800             | 1.48419900  | 5.23287400  |
| H | -2.12540700             | 0.51559600  | 4.64725700  |
| H | -2.14513500             | 2.27016700  | 4.45500700  |
| C | -0.36728200             | 0.03212600  | 2.51876600  |
| C | -0.49350000             | -1.33569800 | 3.09444100  |
| H | 0.35576400              | -1.58433400 | 3.74325700  |
| H | -0.53136800             | -2.10198300 | 2.31327200  |
| H | -1.39952300             | -1.43450200 | 3.69980400  |
| H | 1.17358000              | -0.21371300 | -0.57969300 |
| H | 0.44975800              | -1.52719000 | 0.34283900  |
| H | 2.29039200              | -1.30319900 | 2.07517900  |
| H | 3.01243700              | -0.02700900 | 1.13512900  |
| C | 4.28978200              | -2.42950200 | 0.87558100  |
| C | 5.24527400              | -3.35215500 | 0.03765000  |
| C | 6.78508000              | -3.08829700 | 0.47187700  |
| C | 7.14293400              | -1.66622500 | 0.17769000  |

|   |             |             |             |
|---|-------------|-------------|-------------|
| C | 8.63495200  | -1.51420300 | 0.10045500  |
| C | 8.93438400  | -0.10045600 | -0.41241500 |
| S | 9.19797500  | -0.11395900 | -2.22705000 |
| C | 9.92256100  | 1.52847100  | -2.06414100 |
| C | 10.86843200 | 1.43524900  | -0.73881900 |
| C | 10.18840000 | 0.44574800  | 0.20829000  |
| H | 9.93319200  | 0.91189200  | 1.16636900  |
| N | 11.24409600 | -0.59821800 | 0.39761900  |
| H | 11.16881800 | -1.41728500 | 0.95164700  |
| C | 12.34474700 | -0.23649500 | -0.33439900 |
| O | 13.37223100 | -0.92219600 | -0.37228800 |
| N | 12.21799600 | 0.85382000  | -0.98184700 |
| H | 12.94778800 | 1.24594800  | -1.55779900 |
| H | 10.94075600 | 2.43362700  | -0.28014800 |
| H | 9.13821400  | 2.29155000  | -1.97688700 |
| H | 10.56923500 | 1.77336700  | -2.93064800 |
| H | 8.08173900  | 0.54390800  | -0.18404000 |
| H | 9.06161800  | -2.26029200 | -0.60520700 |
| H | 9.08437600  | -1.65808700 | 1.08696100  |
| H | 6.76618700  | -1.02124700 | 0.96273200  |
| H | 6.69494600  | -1.37428200 | -0.79452400 |
| H | 7.45628100  | -3.76609200 | -0.11465700 |
| H | 6.90866400  | -3.28870300 | 1.53138500  |
| H | 5.13702500  | -3.13539700 | -1.05381100 |
| H | 4.99051700  | -4.40961400 | 0.19592700  |
| O | 4.60040700  | -2.02462900 | 2.08264600  |
| C | -1.70198600 | 0.56465200  | -3.83376600 |
| H | -1.24863900 | 1.42207100  | -4.33471600 |
| C | -1.62608000 | 0.70304900  | -2.32699900 |
| H | -2.11164500 | 1.62938900  | -1.99229000 |
| H | -0.58233700 | 0.81525900  | -1.99835900 |
| C | -2.24805800 | -0.43176600 | -1.59554900 |
| C | -2.73198700 | -1.62561500 | -2.07265000 |
| H | -2.78203000 | -2.03386000 | -3.07022100 |
| N | -3.19807500 | -2.31598800 | -0.97814300 |
| H | -3.71274100 | -3.18489300 | -0.99481000 |
| C | -3.01566000 | -1.54080100 | 0.11152500  |
| H | -3.30844300 | -1.82357500 | 1.11211400  |
| N | -2.44111200 | -0.39854400 | -0.22644700 |
| C | -4.15405500 | 8.66575900  | -2.27744600 |
| H | -3.79808600 | 9.67638700  | -2.06492000 |
| C | -3.93282800 | 7.73337900  | -1.09860600 |
| H | -4.44546100 | 8.12800900  | -0.21098100 |
| H | -2.86696700 | 7.70358300  | -0.83668500 |

|    |             |             |             |
|----|-------------|-------------|-------------|
| C  | -4.42508500 | 6.31841200  | -1.36891100 |
| H  | -3.89570900 | 5.90431000  | -2.23880100 |
| H  | -5.48527800 | 6.35544600  | -1.65858000 |
| C  | -4.26602500 | 5.37561000  | -0.18281200 |
| H  | -4.76659600 | 5.80778600  | 0.69608600  |
| H  | -3.20594800 | 5.26992800  | 0.08607500  |
| C  | -4.85447600 | 4.01279300  | -0.47928000 |
| H  | -4.31513000 | 3.51643500  | -1.29362600 |
| H  | -5.90416100 | 4.09390600  | -0.78143400 |
| N  | -4.79797900 | 3.08028100  | 0.67726500  |
| H  | -5.37351800 | 2.20004900  | 0.46249000  |
| H  | -5.13690800 | 3.51767900  | 1.53181900  |
| H  | 2.96433500  | -2.10417600 | -0.66028700 |
| Rh | -1.77158100 | 1.10643400  | 1.14547200  |
| H  | -5.21607900 | 8.73775300  | -2.53296000 |
| H  | -3.62705500 | 8.31253500  | -3.16974400 |
| H  | -2.74142600 | 0.49381700  | -4.17378500 |
| H  | -1.18062300 | -0.33124300 | -4.18625100 |
| C  | -6.24810800 | -0.29737200 | 0.49453600  |
| N  | -6.03658900 | 0.77859300  | -0.19278600 |
| C  | -6.38837900 | -0.16183000 | 1.97784700  |
| H  | -7.26916100 | -0.69134900 | 2.35239700  |
| H  | -5.51360000 | -0.58435800 | 2.48674000  |
| H  | -6.46270400 | 0.88741000  | 2.26626000  |
| C  | -6.55339700 | -0.48208000 | -2.29077600 |
| H  | -6.20409600 | -0.62150200 | -3.31959600 |
| H  | -7.61704300 | -0.21226200 | -2.36147200 |
| C  | -5.78549300 | 0.64529800  | -1.62634100 |
| H  | -6.02424600 | 1.60130700  | -2.10536900 |
| H  | -4.70015100 | 0.49335600  | -1.75300100 |
| C  | -6.41223100 | -1.74440600 | -1.49621200 |
| C  | -6.30259500 | -1.63350200 | -0.10502400 |
| C  | -6.20900800 | -2.80101500 | 0.67963900  |
| H  | -6.12875000 | -2.71728900 | 1.75840300  |
| C  | -6.21597900 | -4.05896000 | 0.09477300  |
| C  | -6.33478300 | -4.16562100 | -1.31861800 |
| C  | -6.43029400 | -3.00665200 | -2.08918700 |
| H  | -6.53156400 | -3.08091100 | -3.16762300 |
| O  | -6.12455100 | -5.23429900 | 0.75476200  |
| O  | -6.34374900 | -5.42066700 | -1.80131800 |
| C  | -6.02845300 | -5.17235400 | 2.16545000  |
| H  | -6.90651600 | -4.68597700 | 2.60787000  |
| H  | -5.97390900 | -6.20370900 | 2.50917300  |
| H  | -5.12456600 | -4.63552700 | 2.48355300  |



|   |             |             |             |
|---|-------------|-------------|-------------|
| C | -6.51636500 | -5.58232400 | -3.20071000 |
| H | -5.69319200 | -5.12247400 | -3.76104500 |
| H | -6.51950800 | -6.65605100 | -3.37856600 |
| H | -7.46596500 | -5.15128100 | -3.53739200 |
| H | -3.82509700 | 2.72343100  | 0.84163000  |

---

$I_{eq}^S$

---

Coordinates (Angstroms)

X Y Z

---

|   |             |             |             |
|---|-------------|-------------|-------------|
| H | 2.82753900  | 1.77381100  | 0.12013000  |
| H | 3.63838100  | 0.36792400  | -1.12746000 |
| N | -3.11250800 | -1.85312400 | 0.12619000  |
| C | -2.25939500 | -1.00212500 | -0.68153000 |
| C | -0.93250200 | -0.67048800 | -0.01146800 |
| C | -0.05787100 | 0.06844800  | -0.97372500 |
| C | 0.09137700  | 1.47615400  | -1.07628800 |
| C | -0.61930800 | 2.51817200  | -0.28438000 |
| H | -1.48081500 | 2.91704600  | -0.83473700 |
| H | 0.03458300  | 3.36314900  | -0.04908300 |
| H | -0.99886500 | 2.12246200  | 0.66220400  |
| C | 1.03006100  | 1.72896200  | -2.15256400 |
| C | 1.36218600  | 3.06916100  | -2.71240000 |
| H | 0.58850900  | 3.40652400  | -3.41353800 |
| H | 2.30761600  | 3.05350200  | -3.26345300 |
| H | 1.44189000  | 3.82787600  | -1.92892500 |
| C | 1.36682400  | 0.45644300  | -2.75454800 |
| C | 2.19918400  | 0.27377500  | -3.97583200 |
| H | 1.58603300  | 0.34371500  | -4.88225000 |
| H | 2.68630400  | -0.70620100 | -3.98860700 |
| H | 2.97909700  | 1.03783100  | -4.05035400 |
| C | 0.70983300  | -0.57503400 | -2.02402800 |
| C | 0.71910500  | -2.03154200 | -2.33927400 |
| H | -0.02191100 | -2.29157000 | -3.10603500 |
| H | 0.48541500  | -2.63827200 | -1.45824100 |
| H | 1.69661500  | -2.35584100 | -2.71315400 |
| H | -1.09330900 | -0.07228700 | 0.89587500  |
| H | -0.43831600 | -1.59789500 | 0.31176000  |
| H | -2.09470300 | -1.51812300 | -1.63253400 |
| H | -2.79127800 | -0.07600900 | -0.94446500 |

|   |              |             |             |
|---|--------------|-------------|-------------|
| C | -4.22360900  | -2.37863200 | -0.43864100 |
| C | -5.27139900  | -3.13767100 | 0.45152700  |
| C | -6.76462700  | -2.90286800 | -0.13522700 |
| C | -7.08928200  | -1.44373600 | -0.08594700 |
| C | -8.57621300  | -1.24282500 | -0.14810800 |
| C | -8.85882800  | 0.23983600  | 0.12249400  |
| S | -9.25376100  | 0.50952400  | 1.89276500  |
| C | -9.90247300  | 2.12638800  | 1.43009500  |
| C | -10.75248000 | 1.85729700  | 0.06447300  |
| C | -10.04310000 | 0.71777700  | -0.66822500 |
| H | -9.70171200  | 1.02586900  | -1.66264500 |
| N | -11.12069400 | -0.31491600 | -0.78022300 |
| H | -11.03618400 | -1.21043800 | -1.19781500 |
| C | -12.25722600 | 0.18260600  | -0.19807900 |
| O | -13.30975400 | -0.46227600 | -0.13758700 |
| N | -12.13698700 | 1.35506400  | 0.28661300  |
| H | -12.89143200 | 1.84919300  | 0.73908500  |
| H | -10.75380900 | 2.77579100  | -0.54276300 |
| H | -9.08578600  | 2.84655700  | 1.29053000  |
| H | -10.60069300 | 2.51709600  | 2.19744900  |
| H | -7.96827800  | 0.81945400  | -0.13310300 |
| H | -9.08066800  | -1.86143900 | 0.62616200  |
| H | -8.95792600  | -1.52337200 | -1.13373700 |
| H | -6.63261100  | -0.93579600 | -0.92718100 |
| H | -6.70240800  | -1.01904300 | 0.86331000  |
| H | -7.50159000  | -3.46575000 | 0.49245900  |
| H | -6.81841100  | -3.25887800 | -1.15911900 |
| H | -5.23459400  | -2.76026000 | 1.50327600  |
| H | -5.04567100  | -4.21320700 | 0.47361600  |
| O | -4.43044400  | -2.15410500 | -1.71309000 |
| C | 1.51858800   | 1.13988400  | 4.21877600  |
| H | 1.29379200   | 2.17505600  | 4.48150300  |
| C | 1.92893900   | 1.02266700  | 2.76396200  |
| H | 2.79921600   | 1.66094200  | 2.55286400  |
| H | 1.14813400   | 1.41980000  | 2.10140800  |
| C | 2.22789900   | -0.36966600 | 2.33322500  |
| C | 2.29027700   | -1.52327000 | 3.07464700  |
| H | 2.15628400   | -1.70632000 | 4.12932800  |
| N | 2.54370800   | -2.54074400 | 2.18120900  |
| H | 2.64175400   | -3.51939100 | 2.39835500  |
| C | 2.63833200   | -1.99809100 | 0.94687900  |
| H | 2.84437600   | -2.56431700 | 0.04966900  |
| N | 2.45001000   | -0.68988600 | 1.00431700  |
| C | 4.37938400   | 8.84298100  | 1.66126100  |

|    |             |             |             |
|----|-------------|-------------|-------------|
| H  | 3.90750200  | 9.81431700  | 1.49461200  |
| C  | 4.03075900  | 7.84924000  | 0.56696900  |
| H  | 4.34225800  | 8.24620500  | -0.40860300 |
| H  | 2.94112500  | 7.72806000  | 0.50186200  |
| C  | 4.67827600  | 6.48836200  | 0.77839400  |
| H  | 4.34865600  | 6.07068400  | 1.74101800  |
| H  | 5.76643200  | 6.61979100  | 0.87406200  |
| C  | 4.39645000  | 5.48858200  | -0.33390000 |
| H  | 4.69274700  | 5.92415200  | -1.29983300 |
| H  | 3.31679900  | 5.29350500  | -0.40768700 |
| C  | 5.13790200  | 4.17682400  | -0.13263800 |
| H  | 4.77046800  | 3.67985000  | 0.77618200  |
| H  | 6.20328300  | 4.38584700  | 0.03897300  |
| N  | 5.03909200  | 3.20165200  | -1.22723500 |
| H  | 5.90030100  | 1.76491300  | -0.71181700 |
| H  | 5.22580300  | 3.66333600  | -2.11306300 |
| H  | -3.00350700 | -1.85971000 | 1.12932100  |
| Rh | 2.12454700  | 0.57951800  | -0.70031400 |
| H  | 5.46041200  | 9.00777300  | 1.71734000  |
| H  | 4.05437100  | 8.48370700  | 2.64336700  |
| H  | 2.31061000  | 0.79744000  | 4.89321900  |
| H  | 0.62554900  | 0.54348800  | 4.43140700  |
| C  | 6.00686100  | -0.24910000 | -0.91359800 |
| N  | 6.08323700  | 0.85122000  | -0.20943200 |
| C  | 6.08690300  | -0.13229900 | -2.39421500 |
| H  | 6.92564300  | -0.71263200 | -2.78939800 |
| H  | 5.16818400  | -0.52376400 | -2.84124800 |
| H  | 6.19546800  | 0.90764800  | -2.70382700 |
| C  | 6.34846700  | -0.36040600 | 1.90337900  |
| H  | 5.95631900  | -0.42131900 | 2.92344500  |
| H  | 7.43977200  | -0.26458700 | 1.99501300  |
| C  | 5.77409200  | 0.85928700  | 1.21706900  |
| H  | 6.16681400  | 1.78548600  | 1.64256500  |
| H  | 4.67422500  | 0.88486000  | 1.29166700  |
| C  | 6.01559300  | -1.60493100 | 1.13542100  |
| C  | 5.86427100  | -1.52781000 | -0.25957500 |
| C  | 5.58181900  | -2.69492200 | -1.00312700 |
| H  | 5.45458400  | -2.62871100 | -2.07792300 |
| C  | 5.43723300  | -3.91805800 | -0.37333200 |
| C  | 5.60822700  | -3.99287400 | 1.03824200  |
| C  | 5.90610300  | -2.84107100 | 1.76395500  |
| H  | 6.03439700  | -2.89631400 | 2.84036200  |
| O  | 5.13332800  | -5.08469100 | -0.97686200 |
| O  | 5.43708100  | -5.21282800 | 1.57161100  |

|   |            |             |             |
|---|------------|-------------|-------------|
| C | 4.97380600 | -5.05651000 | -2.38510300 |
| H | 5.89085300 | -4.72158400 | -2.88438300 |
| H | 4.75162500 | -6.07940500 | -2.68286000 |
| H | 4.14342500 | -4.40156900 | -2.67946600 |
| C | 5.69225800 | -5.36843800 | 2.96095100  |
| H | 5.00551400 | -4.76322600 | 3.56635500  |
| H | 5.53248100 | -6.42309900 | 3.17659700  |
| H | 6.72308700 | -5.09350400 | 3.20800800  |
| H | 4.08692300 | 2.83195800  | -1.27363900 |

---

$P_{eq}^S$

---

Coordinates (Angstroms)

X Y Z

---

|   |             |             |             |
|---|-------------|-------------|-------------|
| H | 2.62288600  | 1.66883800  | 0.08085300  |
| H | 4.12976100  | 0.25005500  | -0.78106300 |
| N | -3.06964600 | -1.62080300 | 0.24661400  |
| C | -2.13998500 | -0.94513300 | -0.63164400 |
| C | -0.80704500 | -0.64341800 | 0.05177000  |
| C | 0.20659800  | -0.27485500 | -0.97897900 |
| C | 0.44544800  | 1.04568400  | -1.51395700 |
| C | -0.26653300 | 2.29231000  | -1.12537500 |
| H | -1.12898000 | 2.46031100  | -1.78111600 |
| H | 0.38070900  | 3.16946000  | -1.20111700 |
| H | -0.64061600 | 2.24201600  | -0.09947200 |
| C | 1.45252700  | 0.91754400  | -2.53372300 |
| C | 1.94781300  | 2.00053000  | -3.42724600 |
| H | 1.36280100  | 2.04909100  | -4.35338900 |
| H | 2.99302800  | 1.84495300  | -3.71159000 |
| H | 1.87562300  | 2.98010900  | -2.94674500 |
| C | 1.74112300  | -0.50084000 | -2.68319400 |
| C | 2.63543900  | -1.08913700 | -3.71161900 |
| H | 2.04137700  | -1.41811000 | -4.57276600 |
| H | 3.16448300  | -1.97089000 | -3.33530100 |
| H | 3.36946600  | -0.37219700 | -4.08491400 |
| C | 0.98666500  | -1.23498600 | -1.73902800 |
| C | 0.98137700  | -2.71380500 | -1.56744800 |
| H | 0.31043500  | -3.20323900 | -2.28334300 |
| H | 0.64754600  | -3.00420800 | -0.56701800 |
| H | 1.98149900  | -3.13792200 | -1.71575200 |
| H | -0.91942200 | 0.15940100  | 0.79195400  |

|   |              |             |             |
|---|--------------|-------------|-------------|
| H | -0.46332100  | -1.52967200 | 0.60065000  |
| H | -1.99356700  | -1.58630100 | -1.50798500 |
| H | -2.58818900  | -0.02084200 | -1.02212900 |
| C | -4.15993100  | -2.22177900 | -0.28252500 |
| C | -5.18762300  | -2.94854600 | 0.65666200  |
| C | -6.68431100  | -2.80563400 | 0.04948500  |
| C | -7.05632600  | -1.35815100 | -0.00790500 |
| C | -8.54860500  | -1.21099300 | -0.08939400 |
| C | -8.88062300  | 0.27728200  | 0.07239800  |
| S | -9.29416300  | 0.66088400  | 1.81721900  |
| C | -9.99225100  | 2.21807900  | 1.23673700  |
| C | -10.82530400 | 1.82353200  | -0.10870000 |
| C | -10.07523000 | 0.65795200  | -0.75475000 |
| H | -9.73833800  | 0.90452100  | -1.76768900 |
| N | -11.11815900 | -0.41482600 | -0.79542300 |
| H | -11.00231300 | -1.33489000 | -1.14691700 |
| C | -12.27350600 | 0.08594100  | -0.25456200 |
| O | -13.30492400 | -0.58698200 | -0.15114100 |
| N | -12.19406200 | 1.29360800  | 0.14452600  |
| H | -12.96668000 | 1.79414100  | 0.55757900  |
| H | -10.85291800 | 2.69530300  | -0.78072900 |
| H | -9.19853300  | 2.95263600  | 1.04822000  |
| H | -10.70711900 | 2.64006500  | 1.97150800  |
| H | -8.00787100  | 0.86577700  | -0.22144200 |
| H | -9.03716400  | -1.78832400 | 0.72586700  |
| H | -8.91541000  | -1.57423500 | -1.05344200 |
| H | -6.61155900  | -0.89754000 | -0.88211700 |
| H | -6.68882300  | -0.85367100 | 0.90946400  |
| H | -7.40622100  | -3.34558400 | 0.71374200  |
| H | -6.72070400  | -3.23613200 | -0.94617500 |
| H | -5.16905900  | -2.49524700 | 1.67850300  |
| H | -4.92731800  | -4.01171300 | 0.75718000  |
| O | -4.36662000  | -2.09671500 | -1.57056300 |
| C | 1.43865000   | 1.80934500  | 4.12754900  |
| H | 1.14592900   | 2.85861000  | 4.19215300  |
| C | 1.76182900   | 1.41976200  | 2.69661500  |
| H | 2.56619600   | 2.05420300  | 2.29808400  |
| H | 0.90788300   | 1.61707500  | 2.03265900  |
| C | 2.16298100   | -0.00487200 | 2.54996500  |
| C | 2.33084000   | -0.95659100 | 3.52187400  |
| H | 2.21249400   | -0.91321000 | 4.59278400  |
| N | 2.70159300   | -2.11245400 | 2.87123900  |
| H | 2.93053500   | -2.99495100 | 3.30034600  |
| C | 2.75559900   | -1.85411000 | 1.55049500  |

|    |             |             |             |
|----|-------------|-------------|-------------|
| H  | 3.06148500  | -2.57567000 | 0.80391500  |
| N  | 2.43804600  | -0.58742700 | 1.32147800  |
| C  | 4.06306400  | 9.39747300  | 1.02962700  |
| H  | 3.54245700  | 10.32461000 | 0.77715000  |
| C  | 3.68825000  | 8.26476500  | 0.09080500  |
| H  | 3.92431500  | 8.54698700  | -0.94415900 |
| H  | 2.60167900  | 8.10350500  | 0.11164600  |
| C  | 4.39762800  | 6.96046100  | 0.42373900  |
| H  | 4.13598600  | 6.64968800  | 1.44593400  |
| H  | 5.48359100  | 7.13441400  | 0.44091900  |
| C  | 4.09384700  | 5.83071500  | -0.54856200 |
| H  | 4.34229300  | 6.15485300  | -1.57039700 |
| H  | 3.01364800  | 5.61682000  | -0.55797800 |
| C  | 4.86129200  | 4.55498900  | -0.23695500 |
| H  | 4.56606800  | 4.16898600  | 0.74878400  |
| H  | 5.93275700  | 4.78280400  | -0.16021800 |
| N  | 4.70428000  | 3.46290200  | -1.20238700 |
| H  | 5.74478300  | 1.94183400  | -0.41519800 |
| H  | 4.89357700  | 3.81496800  | -2.13708900 |
| H  | -2.91184500 | -1.62669300 | 1.24292500  |
| Rh | 2.24720100  | 0.28584400  | -0.62877000 |
| H  | 5.13782700  | 9.60326900  | 0.99311600  |
| H  | 3.81481800  | 9.15330800  | 2.06789100  |
| H  | 2.30337600  | 1.66999700  | 4.78381700  |
| H  | 0.61589800  | 1.21103500  | 4.53152000  |
| C  | 5.31090300  | 0.02222900  | -0.77072200 |
| N  | 5.93155300  | 1.02235200  | 0.00255600  |
| C  | 5.72888100  | 0.14763000  | -2.22407300 |
| H  | 6.79108700  | -0.08970800 | -2.32167500 |
| H  | 5.16619900  | -0.52068600 | -2.87700900 |
| H  | 5.57235300  | 1.17501600  | -2.56471500 |
| C  | 6.14497300  | -0.30637600 | 2.01781900  |
| H  | 5.73624700  | -0.44578800 | 3.02634300  |
| H  | 7.23362700  | -0.22381200 | 2.13542000  |
| C  | 5.60456000  | 0.97707000  | 1.41223400  |
| H  | 6.03864700  | 1.85307700  | 1.90246600  |
| H  | 4.50580200  | 1.03238300  | 1.55035500  |
| C  | 5.82478400  | -1.50166900 | 1.16343900  |
| C  | 5.43824000  | -1.35032700 | -0.16829200 |
| C  | 5.12234600  | -2.48907500 | -0.93119000 |
| H  | 4.82784000  | -2.36942800 | -1.96889700 |
| C  | 5.20516200  | -3.76657900 | -0.39583900 |
| C  | 5.61565700  | -3.92278600 | 0.95416800  |
| C  | 5.91721700  | -2.79362000 | 1.70404200  |

|   |            |             |             |
|---|------------|-------------|-------------|
| H | 6.23595000 | -2.90233600 | 2.73734200  |
| O | 4.93649100 | -4.91585300 | -1.06017100 |
| O | 5.67564400 | -5.19793000 | 1.39836000  |
| C | 4.64668300 | -4.80978800 | -2.43826600 |
| H | 5.46304700 | -4.32310900 | -2.98684000 |
| H | 4.52112800 | -5.82873700 | -2.80129600 |
| H | 3.71706500 | -4.24891500 | -2.61819000 |
| C | 6.17100200 | -5.40034400 | 2.70806400  |
| H | 5.51669600 | -4.94465000 | 3.46446600  |
| H | 6.19525200 | -6.47835100 | 2.85854900  |
| H | 7.18135100 | -4.99052000 | 2.82435600  |
| H | 3.73442800 | 3.15313900  | -1.20676000 |

---

## Cartesian coordinates (in Å) of stability points of the favorable path in K121H

system

$I_{ax}^R$

---

|   | Coordinates (Angstroms) |             |             |
|---|-------------------------|-------------|-------------|
|   | X                       | Y           | Z           |
| O | 8.74222200              | -3.83914200 | -1.54274000 |
| C | 9.04939200              | -2.65999900 | -1.43627400 |
| N | 9.49120400              | -2.03120900 | -0.28682100 |
| H | 9.50831500              | -2.62823100 | 0.52912100  |
| C | 9.06038800              | -0.65564600 | -0.19354700 |
| H | 9.87502000              | 0.05079800  | -0.02006200 |
| N | 8.91529600              | -1.62768800 | -2.40391500 |
| H | 9.71019100              | -1.62774600 | -3.04379600 |
| C | 8.69733400              | -0.38704700 | -1.67964700 |
| H | 9.28414000              | 0.43830500  | -2.07222800 |
| C | 7.23005900              | -0.00309900 | -1.69587400 |
| H | 7.01879800              | 0.61926500  | -2.55209200 |
| H | 6.58826300              | -0.89437900 | -1.74404300 |
| S | 6.93723300              | 0.92080000  | -0.14903900 |
| C | 7.83399300              | -0.38402600 | 0.73625000  |
| H | 8.01021500              | 0.04287600  | 1.76175800  |
| C | 6.96646300              | -1.62525900 | 0.94757800  |
| H | 6.60222400              | -1.98197700 | -0.02507200 |
| H | 7.67875700              | -2.40567100 | 1.24956300  |
| C | 5.80881000              | -1.48594000 | 1.94523000  |
| H | 5.59798800              | -2.49139000 | 2.33148800  |
| H | 6.14112900              | -0.89592200 | 2.81113000  |
| C | 4.48551400              | -0.90030800 | 1.41651900  |
| H | 4.60667500              | 0.16507900  | 1.17591600  |
| H | 4.26882800              | -1.34403000 | 0.43314800  |
| C | 3.37880700              | -1.15739100 | 2.45011400  |
| H | 3.45135100              | -2.21351200 | 2.75219900  |
| H | 3.60092100              | -0.60253400 | 3.37399000  |
| C | 1.91771500              | -0.88816900 | 2.09473500  |
| O | 1.52527800              | -0.48023600 | 1.00044300  |
| N | 1.00379100              | -1.12944700 | 3.09199600  |
| H | 1.35457900              | -1.57621000 | 3.92758300  |
| C | -0.38779100             | -1.39206400 | 2.73460300  |
| H | -0.65775400             | -2.38591600 | 3.10726600  |



|   |             |             |             |
|---|-------------|-------------|-------------|
| H | -0.44668600 | -1.43645100 | 1.64399100  |
| C | -1.38035900 | -0.34210700 | 3.22183800  |
| H | -1.02075600 | 0.64248300  | 2.90006600  |
| H | -1.38603900 | -0.31861700 | 4.32206200  |
| C | -2.78840900 | -0.53367500 | 2.73944700  |
| C | -3.65062300 | -1.64443100 | 3.01204000  |
| C | -3.38509100 | -2.83990300 | 3.86225300  |
| H | -2.31828800 | -3.02564700 | 4.00204000  |
| H | -3.82330400 | -2.72296800 | 4.86255400  |
| H | -3.81652900 | -3.74974300 | 3.43340100  |
| C | -4.94086400 | -1.31903100 | 2.45838800  |
| C | -6.12868200 | -2.21370500 | 2.54628100  |
| H | -5.88111800 | -3.24576300 | 2.27580700  |
| H | -6.52120000 | -2.24124700 | 3.56956700  |
| H | -6.94618100 | -1.87804500 | 1.90194100  |
| C | -4.91039800 | -0.01091800 | 1.89756700  |
| C | -6.05681300 | 0.75859700  | 1.33829200  |
| H | -6.85012000 | 0.10032000  | 0.97080100  |
| H | -6.51088300 | 1.41412000  | 2.09214100  |
| H | -5.74688600 | 1.39362500  | 0.50277500  |
| C | -3.55390000 | 0.47012000  | 2.02726900  |
| C | -3.09537900 | 1.84191600  | 1.66573700  |
| H | -3.66406100 | 2.23892600  | 0.81973200  |
| H | -3.21523000 | 2.54169100  | 2.50261900  |
| H | -2.04029700 | 1.85818800  | 1.37645500  |
| C | 3.54538000  | 2.66333200  | -0.37456800 |
| O | 4.10062500  | 3.74598100  | -0.29688800 |
| N | 2.61701300  | 2.23212400  | 0.52708300  |
| H | 2.27293100  | 1.27821600  | 0.49854700  |
| C | 1.97317900  | 3.19281500  | 1.41179800  |
| H | 1.65062100  | 4.06588200  | 0.83241800  |
| C | 0.76564300  | 2.53942900  | 2.07696400  |
| H | 1.07623900  | 1.80388100  | 2.82961900  |
| H | 0.20086100  | 1.97298500  | 1.32456600  |
| C | -0.15497400 | 3.58968700  | 2.65802300  |
| O | -0.43444400 | 4.61478200  | 2.04755700  |
| N | -0.56202600 | 3.36535700  | 3.94706900  |
| H | -0.26607800 | 2.56132200  | 4.47262400  |
| H | -1.12670600 | 4.06349900  | 4.40318500  |
| C | -2.69809400 | -5.78775100 | -3.49671900 |
| H | -2.62185800 | -6.61379500 | -4.20522400 |
| C | -4.12627200 | -5.62663800 | -3.00377400 |
| H | -4.46206200 | -6.56404900 | -2.54001100 |
| H | -4.79668300 | -5.47185600 | -3.85940700 |

|    |             |             |             |
|----|-------------|-------------|-------------|
| C  | -4.31013800 | -4.50617700 | -2.03829700 |
| N  | -5.55772400 | -3.99968000 | -1.74040100 |
| C  | -5.42013400 | -3.01168700 | -0.82051900 |
| H  | -6.24350500 | -2.43597500 | -0.42410000 |
| N  | -4.14748000 | -2.84811700 | -0.50841900 |
| H  | -6.43036200 | -4.32602700 | -2.12578800 |
| C  | -3.44738500 | -3.77118700 | -1.25896200 |
| H  | -2.37560100 | -3.86251100 | -1.15558100 |
| Rh | -3.42290400 | -1.26239000 | 0.76305600  |
| H  | -3.35075700 | -0.41269700 | -0.57595900 |
| H  | -1.97933500 | -1.65904800 | 0.19715700  |
| C  | -0.36089400 | 0.86603200  | -1.01237700 |
| C  | -1.32002700 | 1.81837900  | -1.64993800 |
| C  | -1.33253000 | 3.16800900  | -1.32297400 |
| H  | -0.59690700 | 3.55839100  | -0.62344200 |
| C  | -2.30054100 | 4.02446200  | -1.85765800 |
| O  | -2.37730100 | 5.33071600  | -1.62523300 |
| C  | -1.39566400 | 5.91795200  | -0.76247500 |
| H  | -1.43231400 | 5.48119400  | 0.23903900  |
| H  | -1.64215500 | 6.97673300  | -0.72598100 |
| H  | -0.39069700 | 5.78816300  | -1.17828800 |
| C  | -3.30746400 | 3.50324800  | -2.72758500 |
| O  | -4.18960400 | 4.41541900  | -3.18259400 |
| C  | -5.20961400 | 3.94520300  | -4.04263100 |
| H  | -4.79177800 | 3.50963000  | -4.95922500 |
| H  | -5.81321500 | 4.81433600  | -4.29803800 |
| H  | -5.83987900 | 3.19720100  | -3.54422600 |
| C  | -3.31011900 | 2.15816600  | -3.03148200 |
| H  | -4.06881700 | 1.75934700  | -3.69566400 |
| C  | -2.31167100 | 1.30083900  | -2.50964300 |
| C  | -2.34164200 | -0.10771900 | -2.75683000 |
| C  | -3.51880900 | -0.78067500 | -3.36820300 |
| H  | -3.44987600 | -1.86822800 | -3.27856200 |
| H  | -3.59461400 | -0.52414200 | -4.43067200 |
| H  | -4.43691400 | -0.45484700 | -2.87477100 |
| N  | -1.28606500 | -0.84988700 | -2.48076400 |
| C  | -0.05117200 | -0.31065100 | -1.90887800 |
| H  | 0.60766500  | -0.02105800 | -2.73940600 |
| H  | 0.44191300  | -1.10241400 | -1.34157400 |
| H  | -1.38243100 | -1.85271000 | -2.55712700 |
| H  | -0.79907400 | 0.48579200  | -0.07436600 |
| H  | 0.57492100  | 1.36649600  | -0.74919100 |
| C  | 3.75944600  | 1.78437000  | -1.60702000 |
| H  | 3.12391800  | 2.17710600  | -2.40745900 |

|   |             |             |             |
|---|-------------|-------------|-------------|
| H | 4.79623200  | 1.86030900  | -1.93455100 |
| H | 3.49996100  | 0.72912700  | -1.45174100 |
| H | 2.67554700  | 3.57012900  | 2.16545500  |
| H | -2.34659900 | -4.88153600 | -4.00118500 |
| H | -2.01198400 | -5.99824500 | -2.67123500 |

---

**P<sub>ax</sub><sup>R</sup>**

---

Coordinates (Angstroms)

X Y Z

---

|   |            |             |             |
|---|------------|-------------|-------------|
| O | 8.73326000 | -3.96593000 | -1.21759100 |
| C | 9.01906700 | -2.77665400 | -1.21484600 |
| N | 9.45477600 | -2.04342900 | -0.12656600 |
| H | 9.48692200 | -2.56762000 | 0.73754100  |
| C | 8.99903200 | -0.67293000 | -0.14907700 |
| H | 9.80128500 | 0.06038800  | -0.04221500 |
| N | 8.86115800 | -1.83402100 | -2.26674200 |
| H | 9.65278200 | -1.87481400 | -2.90937200 |
| C | 8.62381000 | -0.53979000 | -1.65038700 |
| H | 9.19331200 | 0.25916100  | -2.11623300 |
| C | 7.14961700 | -0.18516800 | -1.69007200 |
| H | 6.92269100 | 0.35730200  | -2.59522800 |
| H | 6.52420200 | -1.08870900 | -1.65731500 |
| S | 6.84730200 | 0.86297800  | -0.22650600 |
| C | 7.77237700 | -0.34445600 | 0.76183800  |
| H | 7.94567600 | 0.17221200  | 1.74570200  |
| C | 6.92901500 | -1.57833300 | 1.08466300  |
| H | 6.56669300 | -2.02392900 | 0.14864200  |
| H | 7.65710000 | -2.31690100 | 1.44799400  |
| C | 5.77387000 | -1.37457000 | 2.07410700  |
| H | 5.58358600 | -2.34669000 | 2.54670400  |
| H | 6.09943900 | -0.70633900 | 2.88392900  |
| C | 4.43739300 | -0.86055000 | 1.50558000  |
| H | 4.53763400 | 0.18219200  | 1.17352600  |
| H | 4.22415500 | -1.39107500 | 0.56540400  |
| C | 3.34069200 | -1.04771400 | 2.56455700  |
| H | 3.43425500 | -2.07237300 | 2.95583500  |
| H | 3.55701500 | -0.41143300 | 3.43589100  |
| C | 1.87312700 | -0.83636000 | 2.19680000  |
| O | 1.46792600 | -0.53118500 | 1.07407400  |
| N | 0.96877700 | -1.00732100 | 3.21707000  |

|   |             |             |             |
|---|-------------|-------------|-------------|
| H | 1.33345100  | -1.37754100 | 4.08306900  |
| C | -0.41699200 | -1.34377000 | 2.90099200  |
| H | -0.71776100 | -2.15703100 | 3.56806300  |
| H | -0.45230600 | -1.72038100 | 1.87155600  |
| C | -1.37564300 | -0.16272300 | 3.01101800  |
| H | -0.94040000 | 0.66928200  | 2.45223900  |
| H | -1.43104800 | 0.17260000  | 4.05785400  |
| C | -2.77166500 | -0.37660500 | 2.51300500  |
| C | -3.66916200 | -1.48062400 | 2.77237600  |
| C | -3.41175200 | -2.68200500 | 3.61603300  |
| H | -2.53872400 | -3.24735100 | 3.28313700  |
| H | -3.24114800 | -2.39594300 | 4.66147800  |
| H | -4.26378900 | -3.36549300 | 3.60404200  |
| C | -4.97503400 | -1.11894000 | 2.23096200  |
| C | -6.18511500 | -1.97649200 | 2.33933300  |
| H | -5.96819100 | -3.01950300 | 2.08853100  |
| H | -6.57178500 | -1.96855400 | 3.36462800  |
| H | -6.99286500 | -1.62818100 | 1.69079900  |
| C | -4.88518100 | 0.14923600  | 1.61716700  |
| C | -5.96849000 | 0.91701800  | 0.94491500  |
| H | -6.79033800 | 0.27064700  | 0.62436700  |
| H | -6.39408700 | 1.67509000  | 1.61276000  |
| H | -5.59659300 | 1.44586000  | 0.06091300  |
| C | -3.50964100 | 0.59926500  | 1.75754000  |
| C | -3.00451300 | 1.91639300  | 1.29692200  |
| H | -3.58603200 | 2.31239900  | 0.46055700  |
| H | -3.04968400 | 2.64995700  | 2.11121100  |
| H | -1.96610800 | 1.86624000  | 0.96268000  |
| C | 3.42271200  | 2.51823800  | -0.57903800 |
| O | 3.95819600  | 3.61337600  | -0.59828700 |
| N | 2.50684800  | 2.14952800  | 0.36226000  |
| H | 2.14856800  | 1.20141000  | 0.38523500  |
| C | 1.84977400  | 3.17095900  | 1.16537500  |
| H | 1.50339900  | 3.98399200  | 0.51611400  |
| C | 0.65773200  | 2.55573600  | 1.89196800  |
| H | 0.98075800  | 1.88051200  | 2.69409700  |
| H | 0.11533700  | 1.93340900  | 1.16450500  |
| C | -0.27928600 | 3.63526000  | 2.38656500  |
| O | -0.58068200 | 4.59881100  | 1.69205800  |
| N | -0.67582300 | 3.51537800  | 3.69271100  |
| H | -0.24483700 | 2.84882100  | 4.31005300  |
| H | -1.15904900 | 4.29745500  | 4.10599400  |
| C | -2.67844000 | -6.28133900 | -2.92294400 |
| H | -2.59425300 | -7.15330100 | -3.57275000 |

|    |             |             |             |
|----|-------------|-------------|-------------|
| C  | -4.11821000 | -5.80396500 | -2.85043100 |
| H  | -4.76070300 | -6.61824100 | -2.48956300 |
| H  | -4.48471300 | -5.57031500 | -3.85912400 |
| C  | -4.30960200 | -4.61596800 | -1.97355300 |
| N  | -5.55334800 | -4.06113300 | -1.74804400 |
| C  | -5.42242300 | -3.01632300 | -0.89928100 |
| H  | -6.24398500 | -2.39584600 | -0.57292900 |
| N  | -4.15256500 | -2.86109000 | -0.56196900 |
| H  | -6.42115400 | -4.38668600 | -2.14622700 |
| C  | -3.45030400 | -3.84935500 | -1.22521000 |
| H  | -2.38292500 | -3.95023500 | -1.09315500 |
| Rh | -3.39476400 | -1.26474400 | 0.65062800  |
| H  | -3.03120800 | -0.45348100 | -1.00012400 |
| H  | -1.96846700 | -1.92444000 | 0.33983800  |
| C  | -0.35966200 | 0.51206600  | -1.19042400 |
| C  | -1.23955000 | 1.64714800  | -1.59833600 |
| C  | -0.85254500 | 2.98404000  | -1.48694300 |
| H  | 0.15516300  | 3.21852900  | -1.15252500 |
| C  | -1.74359700 | 4.01062200  | -1.79583100 |
| O  | -1.46513100 | 5.32194000  | -1.75659800 |
| C  | -0.14331500 | 5.69928300  | -1.38237000 |
| H  | 0.05780200  | 5.41398000  | -0.34512100 |
| H  | -0.10882100 | 6.78277300  | -1.48266400 |
| H  | 0.60162800  | 5.24873500  | -2.05003500 |
| C  | -3.06231200 | 3.68045500  | -2.21310400 |
| O  | -3.85944500 | 4.73999300  | -2.48673800 |
| C  | -5.17969300 | 4.45827700  | -2.89551800 |
| H  | -5.20169200 | 3.88739300  | -3.83310800 |
| H  | -5.66205000 | 5.42249500  | -3.04987800 |
| H  | -5.72944600 | 3.89638600  | -2.12680700 |
| C  | -3.43857300 | 2.34836100  | -2.33122300 |
| H  | -4.43488400 | 2.10533200  | -2.68577200 |
| C  | -2.52394000 | 1.32468200  | -2.03951800 |
| C  | -2.85690000 | -0.12744600 | -2.14033600 |
| C  | -4.15061600 | -0.46587000 | -2.85290800 |
| H  | -4.26692400 | -1.54957400 | -2.94443500 |
| H  | -4.14565300 | -0.04017600 | -3.85993000 |
| H  | -5.01915100 | -0.07946800 | -2.31028500 |
| N  | -1.78225700 | -0.88534000 | -2.67127000 |
| C  | -0.42042300 | -0.64370700 | -2.18143400 |
| H  | 0.22834100  | -0.43176000 | -3.04204000 |
| H  | -0.02799600 | -1.54916700 | -1.69903400 |
| H  | -2.01118400 | -1.87018100 | -2.71885400 |
| H  | -0.67144800 | 0.14113200  | -0.19858900 |

|   |             |             |             |
|---|-------------|-------------|-------------|
| H | 0.67673700  | 0.83655700  | -1.07003300 |
| C | 3.64699500  | 1.54047300  | -1.73274400 |
| H | 2.92331000  | 1.77957500  | -2.52017700 |
| H | 4.64828200  | 1.68458400  | -2.13740600 |
| H | 3.50559800  | 0.48801100  | -1.45665600 |
| H | 2.55291600  | 3.62520900  | 1.87451600  |
| H | -2.01941600 | -5.50594400 | -3.32444400 |
| H | -2.30139700 | -6.56427100 | -1.93616500 |

---

## Cartesian coordinates (in Å) of the catalysts and substrate in two systems

### C- S112H

| ----- |                         |             |             |
|-------|-------------------------|-------------|-------------|
|       | Coordinates (Angstroms) |             |             |
|       | X                       | Y           | Z           |
| ----- |                         |             |             |
| H     | 4.56650900              | 0.28755900  | 0.29048400  |
| H     | 5.18184500              | -1.42547800 | -0.90073500 |
| N     | -1.86951800             | -2.36899000 | 0.46575500  |
| C     | -0.84575900             | -1.79740400 | -0.38716700 |
| C     | 0.50496300              | -1.63701600 | 0.30336000  |
| C     | 1.48885900              | -1.10740900 | -0.69164400 |
| C     | 1.81771000              | 0.25218000  | -0.91546000 |
| C     | 1.27043800              | 1.44284800  | -0.20836300 |
| H     | 0.45902200              | 1.90518200  | -0.78411400 |
| H     | 2.03406700              | 2.21066700  | -0.05131100 |
| H     | 0.86214800              | 1.18275100  | 0.77211700  |
| C     | 2.74831100              | 0.29105500  | -2.02890100 |
| C     | 3.21367700              | 1.53823400  | -2.70160200 |
| H     | 2.41160300              | 1.98800500  | -3.29898800 |
| H     | 4.03700700              | 1.34121800  | -3.39722800 |
| H     | 3.53482500              | 2.29853700  | -1.98105700 |
| C     | 2.90505800              | -1.05719300 | -2.52667000 |
| C     | 3.65125500              | -1.45538300 | -3.75261500 |
| H     | 2.98935100              | -1.44523000 | -4.62617400 |
| H     | 4.06572600              | -2.46234500 | -3.66640100 |
| H     | 4.48030700              | -0.77498500 | -3.96977700 |
| C     | 2.15649100              | -1.93116800 | -1.68349000 |
| C     | 1.97389200              | -3.39822400 | -1.86363100 |
| H     | 1.12126900              | -3.62310600 | -2.51609300 |
| H     | 1.78614900              | -3.90119000 | -0.90995900 |
| H     | 2.85577800              | -3.86185500 | -2.31516800 |
| H     | 0.42239500              | -0.95766900 | 1.16232700  |
| H     | 0.84208700              | -2.60437000 | 0.69950100  |
| H     | -0.75647500             | -2.44194900 | -1.26703100 |
| H     | -1.18390400             | -0.82558500 | -0.77640000 |
| C     | -3.05911900             | -2.69619700 | -0.08896500 |
| C     | -4.26635800             | -3.10385100 | 0.82909900  |
| C     | -5.65828000             | -2.61225000 | 0.15827300  |
| C     | -5.64992500             | -1.12106400 | 0.04345000  |
| C     | -7.05307000             | -0.60615500 | -0.10228900 |
| C     | -7.00262200             | 0.92286900  | 0.00221000  |

|   |              |             |             |
|---|--------------|-------------|-------------|
| S | -7.36038200  | 1.46528800  | 1.71695400  |
| C | -7.62308300  | 3.12448400  | 1.06335000  |
| C | -8.48605600  | 2.90078500  | -0.30232700 |
| C | -8.03536600  | 1.55985300  | -0.88315000 |
| H | -7.61531500  | 1.67436200  | -1.88852800 |
| N | -9.31399000  | 0.78350200  | -0.93419200 |
| H | -9.42371500  | -0.14894500 | -1.25355000 |
| C | -10.32146800 | 1.57953800  | -0.45519400 |
| O | -11.49232200 | 1.19251200  | -0.37360800 |
| N | -9.95163400  | 2.74276300  | -0.08889400 |
| H | -10.58507100 | 3.43726900  | 0.27785500  |
| H | -8.27100300  | 3.72480600  | -1.00025700 |
| H | -6.66379700  | 3.62767500  | 0.88540400  |
| H | -8.23068400  | 3.74090900  | 1.75605300  |
| H | -6.00055500  | 1.26085000  | -0.27345800 |
| H | -7.69724100  | -1.00995400 | 0.70928000  |
| H | -7.46930300  | -0.90226200 | -1.06921600 |
| H | -5.07577300  | -0.82138100 | -0.82532400 |
| H | -5.19581000  | -0.69035500 | 0.95963500  |
| H | -6.51387500  | -2.92697700 | 0.80853800  |
| H | -5.77104200  | -3.05781300 | -0.82496100 |
| H | -4.16588400  | -2.63076400 | 1.83709500  |
| H | -4.28683700  | -4.19363200 | 0.97120800  |
| O | -3.18680300  | -2.57282100 | -1.38737200 |
| C | 3.23547900   | -0.03746900 | 4.42235200  |
| H | 2.97420900   | 0.99854500  | 4.64510900  |
| C | 3.39663800   | -0.25363500 | 2.92994900  |
| H | 4.16367100   | 0.41643000  | 2.52077100  |
| H | 2.47823600   | 0.02546800  | 2.39318500  |
| C | 3.75397700   | -1.65102800 | 2.57061400  |
| C | 3.92869600   | -2.74029800 | 3.38499600  |
| H | 3.85412200   | -2.85471700 | 4.45458700  |
| N | 4.25280900   | -3.79136000 | 2.55802000  |
| H | 4.45244500   | -4.73529800 | 2.84754100  |
| C | 4.27104900   | -3.33594800 | 1.28777200  |
| H | 4.50502900   | -3.94087200 | 0.42520500  |
| N | 3.97275300   | -2.04641100 | 1.26370600  |
| C | 7.79079100   | 6.51995400  | 1.21083100  |
| H | 7.32762600   | 7.50032500  | 1.34066400  |
| C | 6.85531800   | 5.54862900  | 0.51017200  |
| H | 6.56414700   | 5.95329600  | -0.46846200 |
| H | 5.92221000   | 5.44768500  | 1.08017600  |
| C | 7.47630400   | 4.17195600  | 0.31469300  |
| H | 7.74166000   | 3.74467500  | 1.29158800  |



|    |             |             |             |
|----|-------------|-------------|-------------|
| H  | 8.42482300  | 4.27673200  | -0.23130100 |
| C  | 6.57357500  | 3.19964700  | -0.43647700 |
| H  | 6.29288300  | 3.63855000  | -1.40551400 |
| H  | 5.63688800  | 3.03869800  | 0.11494600  |
| C  | 7.26548800  | 1.87276900  | -0.66654300 |
| H  | 7.46882200  | 1.35127600  | 0.27296500  |
| H  | 8.21590100  | 2.00561800  | -1.19159900 |
| N  | 6.42031100  | 0.94598200  | -1.48377700 |
| H  | 6.92579100  | 0.10371900  | -1.75909500 |
| H  | 6.08287600  | 1.39804800  | -2.33398100 |
| H  | -1.78310400 | -2.29352900 | 1.46836400  |
| Rh | 3.73355300  | -0.86810700 | -0.50142600 |
| H  | 8.71364200  | 6.66455300  | 0.64025100  |
| H  | 8.07376500  | 6.15547100  | 2.20350300  |
| H  | 4.16067500  | -0.26626000 | 4.96037900  |
| H  | 2.44605300  | -0.67127400 | 4.83893600  |
| H  | 5.56677200  | 0.57454100  | -0.94537800 |

## S- S112H

|   | Coordinates (Angstroms) |             |             |
|---|-------------------------|-------------|-------------|
|   | X                       | Y           | Z           |
| C | 2.42795100              | 0.72629000  | -0.06431900 |
| N | 3.42645700              | -0.05429000 | 0.16272400  |
| C | 2.73041500              | 2.16891800  | -0.33977900 |
| H | 2.26952700              | 2.50872700  | -1.27373200 |
| H | 2.34112800              | 2.81493400  | 0.45621200  |
| H | 3.80980600              | 2.30860400  | -0.39693300 |
| C | 1.91235800              | -2.00922300 | -0.24107200 |
| H | 1.66759400              | -3.01124800 | 0.12961700  |
| H | 2.16121800              | -2.12916900 | -1.30694000 |
| C | 3.11785500              | -1.44052000 | 0.49069000  |
| H | 4.00911100              | -2.04475600 | 0.29072000  |
| H | 2.95138800              | -1.49567400 | 1.57878600  |
| C | 0.74460800              | -1.07891500 | -0.10589700 |
| C | 1.01971800              | 0.29147700  | -0.04455500 |
| C | -0.04600100             | 1.20660700  | 0.01989000  |
| H | 0.16747300              | 2.26915500  | 0.06414300  |
| C | -1.36202400             | 0.77203900  | 0.03637300  |
| C | -1.63475200             | -0.61588900 | -0.02262100 |

|   |             |             |             |
|---|-------------|-------------|-------------|
| C | -0.57896100 | -1.51953100 | -0.09929800 |
| H | -0.77906400 | -2.58567900 | -0.15308200 |
| O | -2.45570400 | 1.57797600  | 0.10436200  |
| O | -2.94771600 | -0.95404400 | 0.00063600  |
| C | -2.21374500 | 2.96632500  | 0.15428800  |
| H | -1.67989400 | 3.31902600  | -0.73843000 |
| H | -3.19290600 | 3.44306600  | 0.19896300  |
| H | -1.63333300 | 3.24746100  | 1.04346800  |
| C | -3.25113900 | -2.33195300 | -0.05880600 |
| H | -2.82491000 | -2.87811000 | 0.79275900  |
| H | -4.33775700 | -2.40357100 | -0.02607000 |
| H | -2.88492900 | -2.78793800 | -0.98788600 |

---

## C-K121H

---

Coordinates (Angstroms)

X Y Z

---

|   |             |             |             |
|---|-------------|-------------|-------------|
| O | -7.70061700 | 4.31136400  | 0.97047200  |
| C | -8.16683200 | 3.27755400  | 0.51227100  |
| N | -8.57377700 | 2.17284500  | 1.23741200  |
| H | -8.41590300 | 2.25220800  | 2.23303600  |
| C | -8.34496900 | 0.92614200  | 0.54469500  |
| H | -9.23278000 | 0.29467600  | 0.46837100  |
| N | -8.29039900 | 2.90018000  | -0.85238800 |
| H | -9.13933300 | 3.29338500  | -1.25982200 |
| C | -8.18438700 | 1.45209800  | -0.90790100 |
| H | -8.92546300 | 1.00043700  | -1.56095100 |
| C | -6.80049900 | 1.02915100  | -1.36237300 |
| H | -6.77548500 | 0.93542800  | -2.43739400 |
| H | -6.04194400 | 1.76408000  | -1.05729400 |
| S | -6.48717200 | -0.58739500 | -0.57456700 |
| C | -7.08163400 | 0.11933500  | 0.98672600  |
| H | -7.21045100 | -0.76824800 | 1.66537600  |
| C | -6.02175200 | 0.99860300  | 1.65115300  |
| H | -5.71294000 | 1.78536100  | 0.95000000  |
| H | -6.57424400 | 1.55338700  | 2.42223500  |
| C | -4.79918400 | 0.27335400  | 2.22927100  |
| H | -4.40167200 | 0.90819900  | 3.03147300  |
| H | -5.12255100 | -0.65755200 | 2.71629200  |
| C | -3.64081300 | -0.04129900 | 1.26346400  |

|   |             |             |             |
|---|-------------|-------------|-------------|
| H | -3.94374800 | -0.80989000 | 0.53881300  |
| H | -3.46527000 | 0.83551600  | 0.62218500  |
| C | -2.40561000 | -0.44562300 | 2.08200000  |
| H | -2.28802400 | 0.29690000  | 2.88630800  |
| H | -2.60926600 | -1.38499300 | 2.61744500  |
| C | -1.04636300 | -0.59233900 | 1.40052800  |
| O | -0.83645900 | -0.39293400 | 0.20291400  |
| N | -0.00694300 | -0.97757000 | 2.21245800  |
| H | -0.19923300 | -1.01028800 | 3.20343500  |
| C | 1.36486800  | -0.67145500 | 1.81960500  |
| H | 1.85589200  | -0.11555400 | 2.62677000  |
| H | 1.32157000  | 0.00580900  | 0.96501500  |
| C | 2.21784500  | -1.87837900 | 1.43479900  |
| H | 1.66798300  | -2.46427100 | 0.68842800  |
| H | 2.35416000  | -2.53449400 | 2.30735800  |
| C | 3.55289400  | -1.49011800 | 0.86688500  |
| C | 4.78740300  | -1.31374000 | 1.60372100  |
| C | 4.93042500  | -1.42388000 | 3.08294400  |
| H | 4.02269700  | -1.10127400 | 3.60088200  |
| H | 5.13086100  | -2.46045000 | 3.38595900  |
| H | 5.75362800  | -0.80964700 | 3.45795800  |
| C | 5.82904500  | -1.09775600 | 0.66807400  |
| C | 7.27894300  | -0.94015100 | 0.97415300  |
| H | 7.44233800  | -0.41884100 | 1.92267900  |
| H | 7.79192500  | -1.90923500 | 1.04483600  |
| H | 7.79845100  | -0.37554300 | 0.19180600  |
| C | 5.25562300  | -1.18058500 | -0.66714000 |
| C | 6.03261100  | -1.03686900 | -1.92923300 |
| H | 6.71501100  | -0.17844100 | -1.89223300 |
| H | 6.65021500  | -1.92171900 | -2.12997700 |
| H | 5.37633300  | -0.89208100 | -2.79148100 |
| C | 3.87389200  | -1.45775400 | -0.54805800 |
| C | 2.89443200  | -1.70691200 | -1.64383900 |
| H | 3.23091800  | -1.28287100 | -2.59347700 |
| H | 2.73496900  | -2.78230000 | -1.80616000 |
| H | 1.92114300  | -1.25869100 | -1.41815200 |
| C | -3.43496600 | -2.19159600 | -2.21879400 |
| O | -4.13391100 | -3.11053200 | -2.61056700 |
| N | -2.36329100 | -2.36597200 | -1.39286800 |
| H | -1.80881500 | -1.56381200 | -1.11358800 |
| C | -1.77965900 | -3.69156900 | -1.24256600 |
| H | -1.64217100 | -4.15720700 | -2.22468800 |
| C | -0.42553500 | -3.57358300 | -0.54981000 |
| H | -0.53887100 | -3.31476000 | 0.51077400  |

|    |             |             |             |
|----|-------------|-------------|-------------|
| H  | 0.13240300  | -2.74588300 | -1.00810000 |
| C  | 0.38490400  | -4.83564100 | -0.74745700 |
| O  | 0.44276400  | -5.40496200 | -1.83100500 |
| N  | 0.95407400  | -5.35135300 | 0.38736500  |
| H  | 1.03825400  | -4.79243200 | 1.22032600  |
| H  | 1.59600400  | -6.11915200 | 0.27254400  |
| C  | 3.63230600  | 6.16450100  | -1.60378600 |
| H  | 3.50044800  | 7.17953000  | -1.98378900 |
| C  | 5.10323400  | 5.77977100  | -1.57423200 |
| H  | 5.66122000  | 6.49560600  | -0.95413300 |
| H  | 5.53084400  | 5.87239100  | -2.58262900 |
| C  | 5.31830000  | 4.39942600  | -1.06288300 |
| N  | 6.56481900  | 3.81722100  | -0.94373600 |
| C  | 6.40559800  | 2.55872800  | -0.45170200 |
| H  | 7.22284800  | 1.88446800  | -0.24239400 |
| N  | 5.12597500  | 2.30347400  | -0.25405100 |
| H  | 7.44402600  | 4.24982400  | -1.17503300 |
| C  | 4.44296600  | 3.44001200  | -0.62898400 |
| H  | 3.36687100  | 3.47532500  | -0.55795900 |
| Rh | 4.22128400  | 0.52165900  | 0.47092100  |
| H  | 3.80223300  | 1.39810600  | 1.72303300  |
| C  | -3.64453900 | -0.78381600 | -2.77695700 |
| H  | -3.02381900 | -0.67447400 | -3.67144600 |
| H  | -4.68835000 | -0.67184100 | -3.07020700 |
| H  | -3.36525400 | 0.01378500  | -2.07862600 |
| H  | -2.45181600 | -4.34756500 | -0.67604600 |
| H  | 3.06062900  | 5.48889400  | -2.24616000 |
| H  | 3.19249900  | 6.12046400  | -0.60345000 |
| H  | 2.87931400  | 1.23446100  | 0.02219200  |

---

## S-K121H

---

Coordinates (Angstroms)

X Y Z

---

|   |            |             |             |
|---|------------|-------------|-------------|
| H | 4.27231200 | 0.30027300  | 0.07292700  |
| C | 2.32722400 | 0.78963300  | -0.06654700 |
| N | 3.32865700 | -0.06158400 | 0.08563500  |
| C | 2.66506100 | 2.22243700  | -0.27214300 |
| H | 2.14865300 | 2.62352400  | -1.14714100 |
| H | 2.34043900 | 2.81254600  | 0.59072800  |

|   |             |             |             |
|---|-------------|-------------|-------------|
| H | 3.73711100  | 2.37926000  | -0.39847300 |
| C | 1.89808400  | -2.00841100 | -0.23823400 |
| H | 1.66704400  | -2.99873200 | 0.16190500  |
| H | 2.10010000  | -2.14914400 | -1.30927500 |
| C | 3.13150800  | -1.46597400 | 0.45147700  |
| H | 4.02927400  | -2.01884900 | 0.17234200  |
| H | 3.02978200  | -1.51986300 | 1.54362700  |
| C | 0.73510300  | -1.07360000 | -0.07541400 |
| C | 0.98191200  | 0.31843200  | -0.02173400 |
| C | -0.10438900 | 1.22968100  | 0.02022100  |
| H | 0.08904500  | 2.29517200  | 0.06577000  |
| C | -1.40557300 | 0.77480200  | 0.03175100  |
| C | -1.64777800 | -0.63500500 | -0.01710100 |
| C | -0.57312100 | -1.52928900 | -0.08023800 |
| H | -0.76519100 | -2.59562100 | -0.13674700 |
| O | -2.50953000 | 1.53388900  | 0.08500300  |
| O | -2.92761300 | -0.98490500 | 0.00008300  |
| C | -2.32834800 | 2.94268600  | 0.12612400  |
| H | -1.80119800 | 3.29943600  | -0.76648600 |
| H | -3.32815900 | 3.37041600  | 0.15302100  |
| H | -1.77677800 | 3.24441900  | 1.02426500  |
| C | -3.25727200 | -2.37465500 | -0.04691800 |
| H | -2.84064300 | -2.90291500 | 0.81609000  |
| H | -4.34311300 | -2.41662200 | -0.01516200 |
| H | -2.89660700 | -2.82849000 | -0.97499300 |

---
